# Supplementary material
Source: Springer Nature journal article supplement (https://www.springermedizin.de/resource/supplementary/13054_2012_1090_MOESM3_ESM.pdf/9711154)

**[TIMP-2]•[IGFBP7]**

**Urine TIMP-2**

**Urine IGFBP7**

Urine NGAL

Plasma Cystatin C

Urine KIM-1

Plasma NGAL

Urine IL-18

Urine pi-GST

Urine L-FABP

0.5

0.6

0.7

0.8

0.9

AUC (with 95% CI)

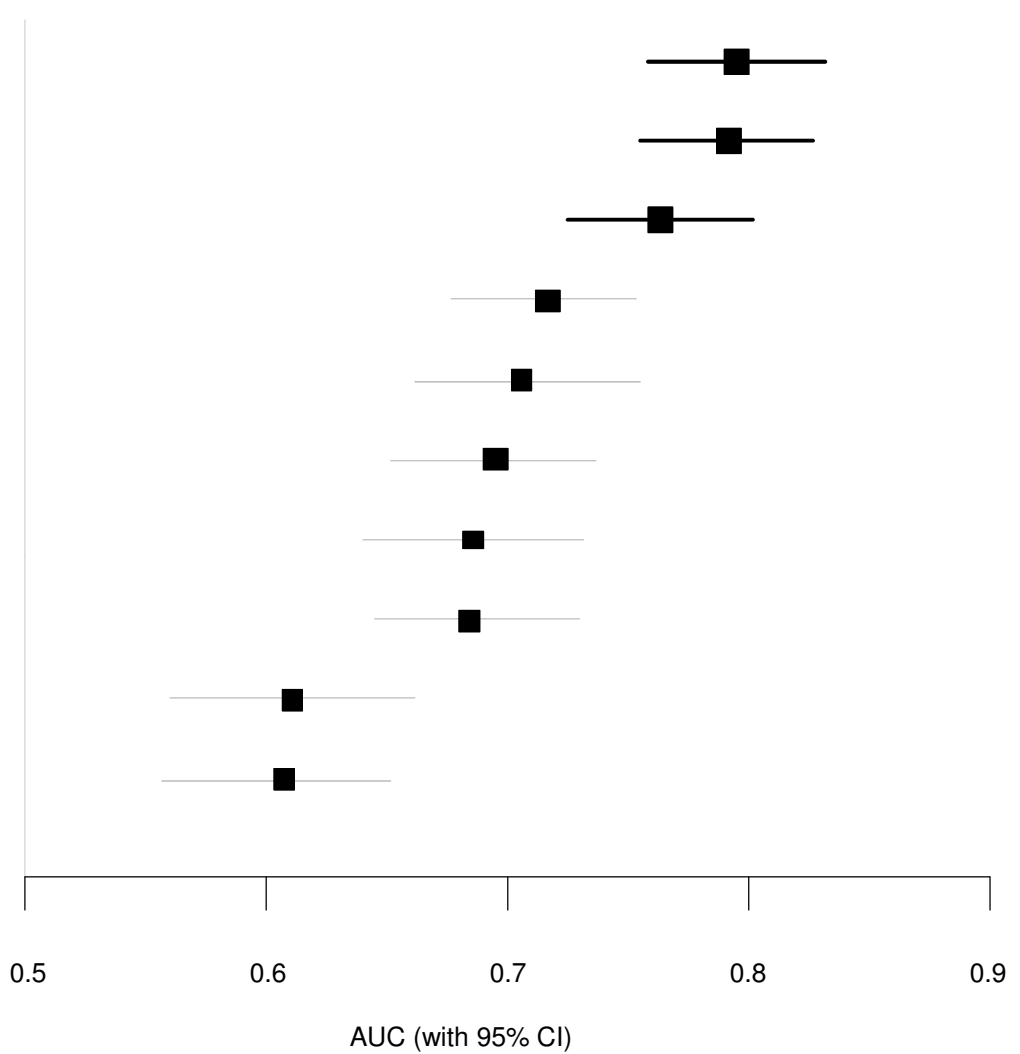

Supplement: MOESM3 [file 9711154]
